# Supplementary material for: Duplex DNA-Invading γ-Modified Peptide Nucleic Acids Enable Rapid Identification of Bloodstream Infections in Whole Blood
Source: PubMed Central journal article supplement (PMC4850259; doi:10.1128/mbio.00345-16), 2016-04-19
Supplement: mbo002162772sf3.pdf [file mbo002162772sf3.pdf]

## PID assay / Culture positive concordant results

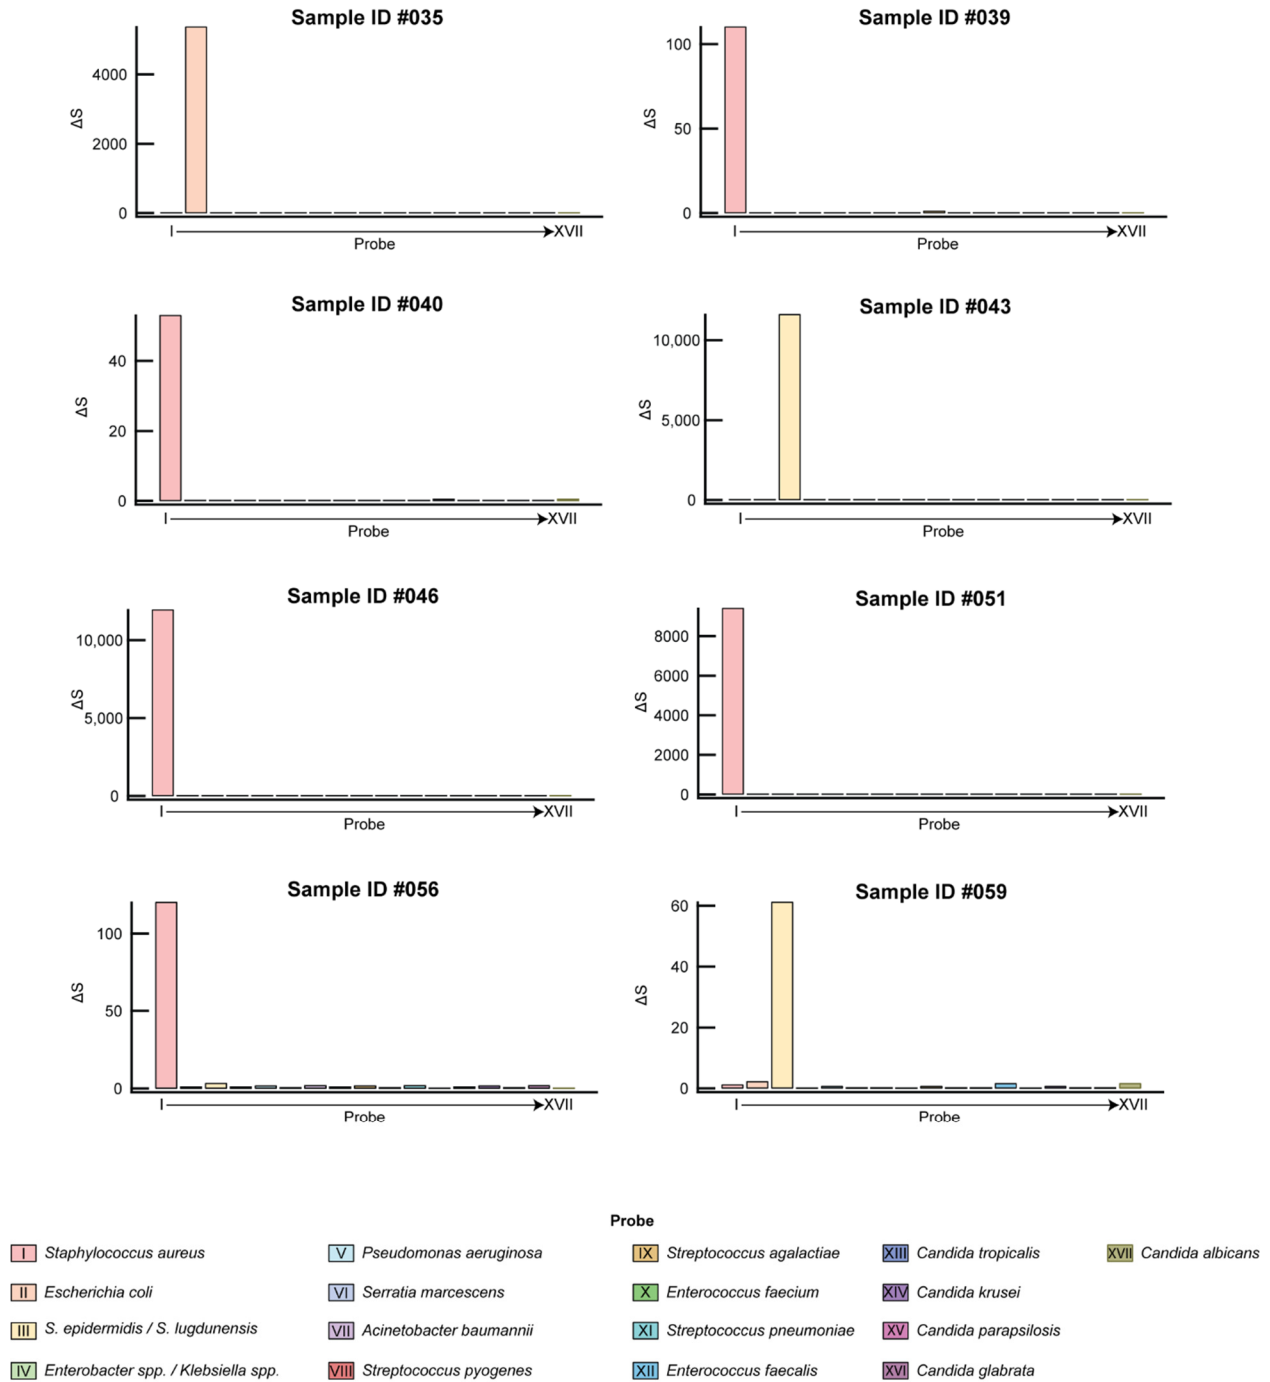

**Figure S3** - Performance of PID assay with concordant culture positive clinical specimens. Sample numbers refer to patient specimens listed in Tables 1 and S3. Sample ID #035, #039, #040, #043, #046, #051, #056, #059 were deemed positive for *E. coli*, *S. aureus*, *S. aureus*, CoNS, *S. aureus*, *S. aureus*, *S. aureus*, and CoNS, respectively.
