# Supplementary material for: Duplex DNA-Invading γ-Modified Peptide Nucleic Acids Enable Rapid Identification of Bloodstream Infections in Whole Blood
Source: PubMed Central journal article supplement (PMC4850259; doi:10.1128/mbio.00345-16), 2016-04-19
Supplement: mbo002162772sf4.pdf [file mbo002162772sf4.pdf]

## PID assay / Culture positive concordant results

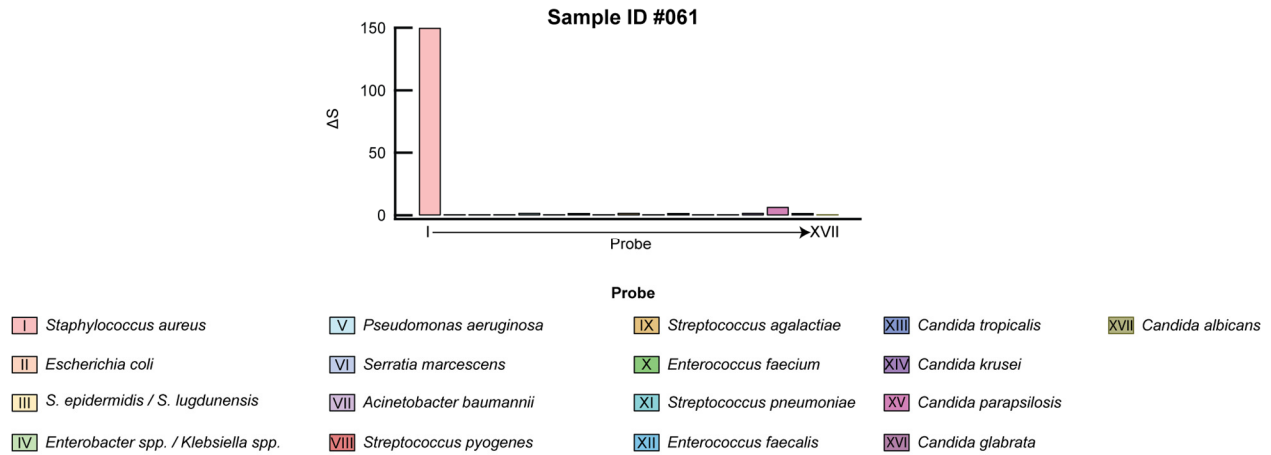

**Figure S4** - Performance of PID assay with concordant culture positive clinical specimens. Sample number refers to patient specimen listed in Tables 1 and S3. Sample ID #061 was deemed positive for *S. aureus*.
