# Supplementary material for: Duplex DNA-Invading γ-Modified Peptide Nucleic Acids Enable Rapid Identification of Bloodstream Infections in Whole Blood
Source: PubMed Central journal article supplement (PMC4850259; doi:10.1128/mbio.00345-16), 2016-04-19
Supplement: mbo002162772st1.pdf [file mbo002162772st1.pdf]

**Supplemental Table S1: Sequences of  $\gamma$ PNA oligos used for bacterial, fungal, and resistance detection**

| <b>Group</b>           | <b>Target Organism or Gene</b>    | <b>Sequence (C to N terminus)</b> |
|------------------------|-----------------------------------|-----------------------------------|
| <b>Gram Positive</b>   | <i>Staphylococcus aureus</i>      | TCGAAGAGCAGGCAA                   |
|                        | <i>Staphylococcus epidermidis</i> | TCGAGGTTTACCAATG                  |
|                        | <i>Staphylococcus lugdunensis</i> |                                   |
|                        | <i>Enterococcus faecalis</i>      | AAGTCAATGATTGCAGG                 |
|                        | <i>Enterococcus faecium</i>       | TTGTCAATGAGAGTAGG                 |
|                        | <i>Streptococcus agalactiae</i>   | TACACAATTAATGAGAA                 |
|                        | <i>Streptococcus pyogenes</i>     | GCAATCAGAGAGAATA                  |
|                        | <i>Streptococcus pneumoniae</i>   | TCGGATGATACCAATT                  |
| <b>Gram Negative</b>   | <i>Escherichia coli</i>           | CAGTTACTCGTTTCCAT                 |
|                        | <i>Pseudomonas aeruginosa</i>     | CGCGGTGATTCTAGAGT                 |
|                        | <i>Serratia marcescens</i>        | AATTCAAGTGGTGGAA                  |
|                        | <i>Acinetobacter baumannii</i>    | GGTGATAGAGATCCAT                  |
|                        | <i>Enterobacter aerogenes</i>     |                                   |
|                        | <i>Enterobacter cloacae</i>       | CTCGTTCGAGAGACAC                  |
|                        | <i>Klebsiella oxytoca</i>         |                                   |
| <b>Fungal</b>          | <i>Candida albicans</i>           | GTATTTACCGATGGG                   |
|                        | <i>Candida glabrata</i>           | ACGTAAGGTCATGTGC                  |
|                        | <i>Candida krusei</i>             | GATCTAAAAGGTGCC                   |
|                        | <i>Candida tropicalis</i>         | TCAGGCTTCTGTAAC                   |
|                        | <i>Candida parapsilosis</i>       | TGCGTAGTTTTTTCTA                  |
| <b>Resistance Gene</b> | <i>bla<sub>NDM-1</sub></i>        | ACCAAGCTGTTGCGTAAC                |
|                        | <i>bla<sub>KPC</sub></i>          | AGTACGGACAACAGTCT                 |
